# Supplementary material for: Contemporary Antiretroviral Therapy Dysregulates Iron Transport and Augments Mitochondrial Dysfunction in HIV-Infected Human Microglia and Neural-Lineage Cells
Source: Preprints.org preprint supplement (doi:10.20944/preprints202307.1492.v1), 2023-07-21
Supplement: Supplementary file 2 [file supplementary]

**Supplemental Materials**


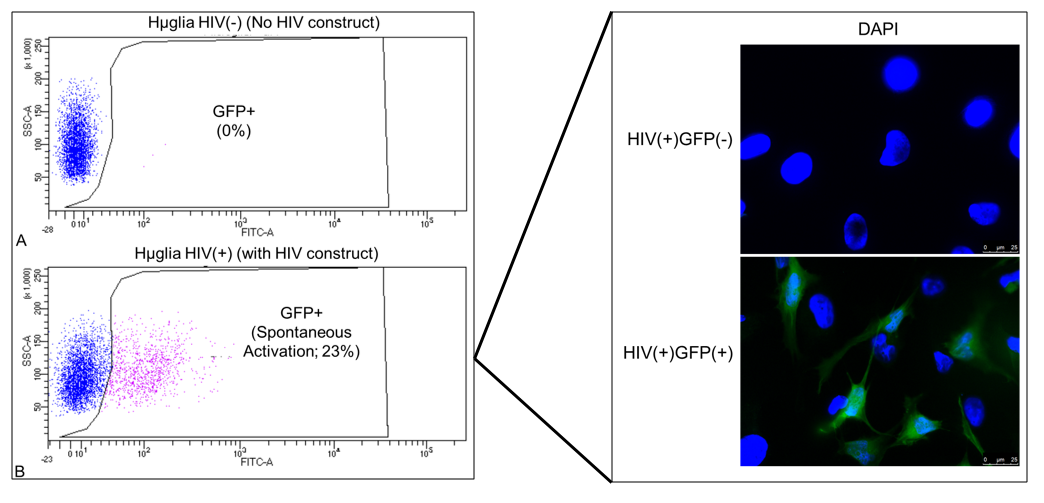


**Supplemental Figure 1.** FACS analysis of HIV+ hμglia cell populations. Scatter plot ***(top left panel)*** shows no GFP expression in uninfected hμglia; the ***bottom left panel*** shows HIV+ (infected) C20 hμglia sorted into GFP-negative (blue dots) and GFP+ (pink dots). X-axis shows mean fluorescence intensity of fluorescein isothiocyanate (FITC)-A signal within HIV+ hμglia; Y-axis shows signal gated according to side-scatter-area (SS-A). GFP+ and GFP-negative cell populations were sorted and separated for use in later experiments Green fluorescence in these populations is shown in the ***top right panel*** (HIV+ hμglia containing latent HIV provirus have blue nuclei stained with DAPI and are GFP-negative) and ***bottom*** ***right*** (activated HIV+/GFP+ hμglia with ongoing HIV transcription show green fluorescence).


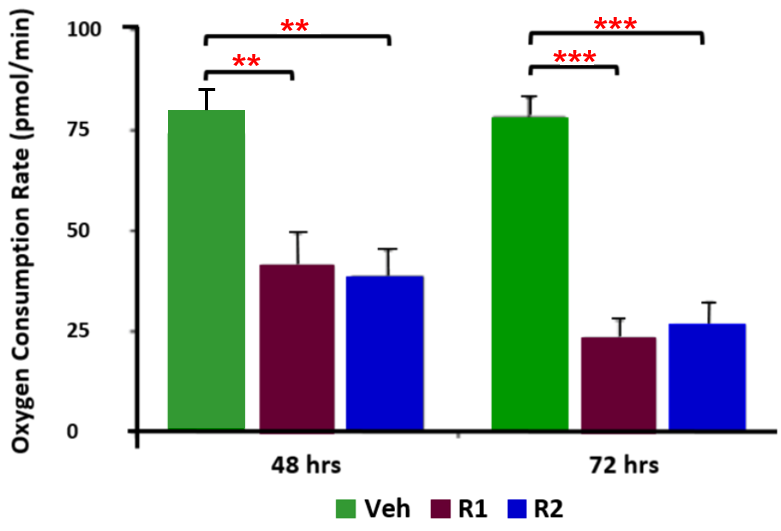


**Supplemental Figure 2.** Effects of antiretroviral Regimen1 (*R1*) and 2 (*R2*) on the basal oxygen consumption rate (OCR) in SH-SY5Y cells at 48 and 72 hours. Both R1 and R2 significantly reduce the basal OCR at 72 hours compared to vehicle-treated (*Veh*) controls. Results summarizing at least 3 separate experiments are shown. ***p<*0.01; ****p*<0.001 (Mann-Whitney U test)


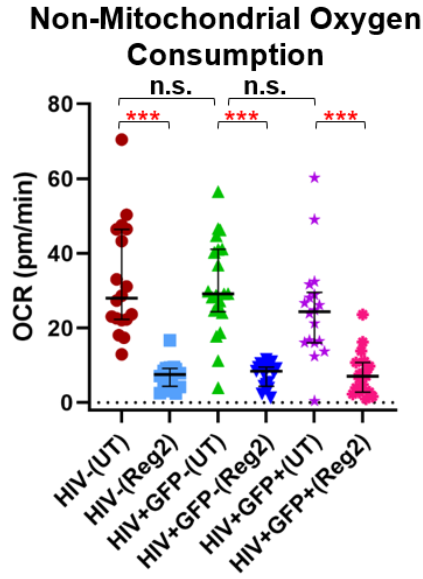


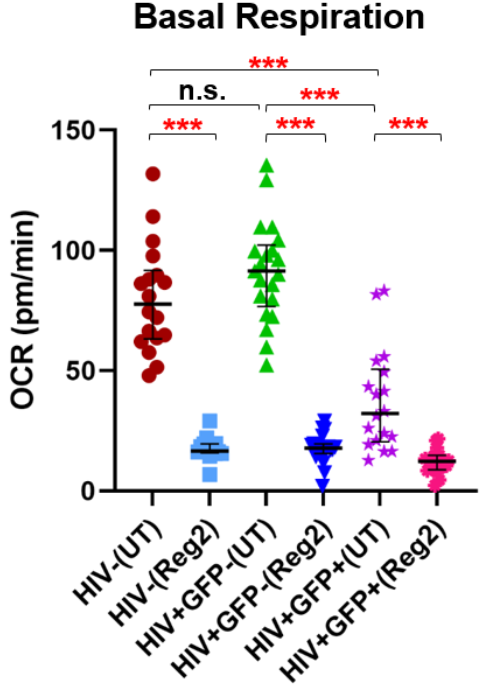


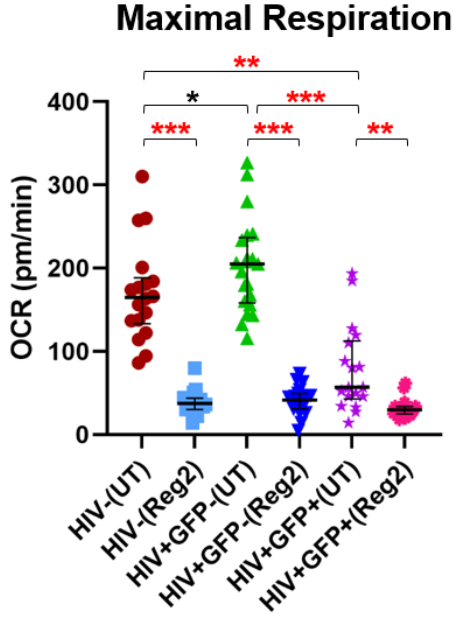


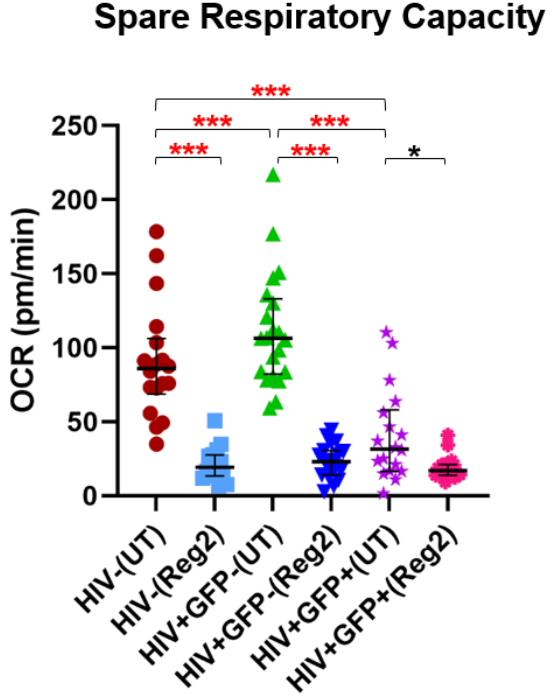


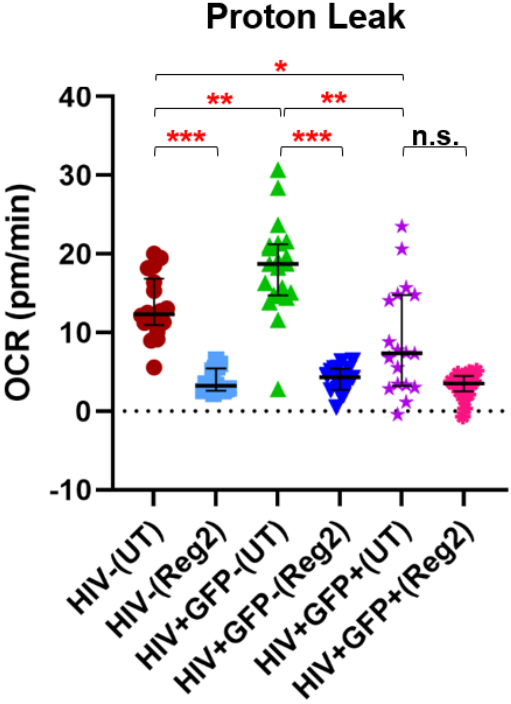


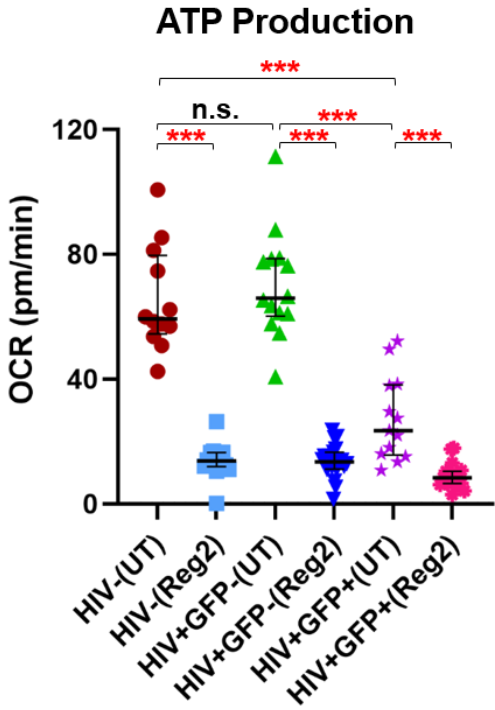


**Supplemental Figure 3.** Differences in mitochondrial energy expenditure across uninfected, latently infected HIV+, and activated HIV+ hμglia groups before and after 24 hours of treatment with antiretroviral drugs. All components of mitochondrial respiration are shown.

*Abbreviations:* *OCR*, oxygen consumption rate (pmol/min); *UT*, untreated (vehicle); *Reg2*, Regimen2

Statistical significance: *n.s*., *p*>0.10; **p*-value=0.05-0.09; **p*<0.05; ***p*<0.001; ********p*<0.0001.

| **Basal OCR** | | |
| --- | --- | --- |
|  | N | Median (IQR) |
| HIV- UT | 12 | 71.6 (66.7, 91.8) |
| HIV- Reg2 | 16 | 16.6 (15.9, 19.4) |
| HIV-GFP- UT | 14 | 84.3 (77.5, 96.2) |
| HIV-GFP- Reg2 | 19 | 17.9 (15.6, 19.5) |
| HIV+GFP+ UT | 13 | 31.2 (19.4, 43.3) |
| HIV+GFP+ Reg2 | 19 | 12.3 (8.8, 14.8) |

| **Maximal OCR** | | |
| --- | --- | --- |
|  | N | Median (IQR) |
| HIV- UT | 12 | 153.8 (133.8, 175.3) |
| HIV- Reg2 | 16 | 37.4 (30.3, 43.4) |
| HIV-GFP- UT | 14 | 184.6 (159.5, 215.9) |
| HIV-GFP- Reg2 | 19 | 41.6 (30.8, 49.4) |
| HIV+GFP+ UT | 13 | 52.5 (32.9, 80.2) |
| HIV+GFP+ Reg2 | 19 | 29.8 (24.7, 33.9) |

**Supplemental Table 1.** Comparison of mitochondrial respiratory measurements in uninfected, latently infected-HIV+, activated HIV+ hμglia with and without antiretroviral Regimen2 (*Reg2*) exposure for 24 hours.Medians and interquartile ranges (*IQR*) of oxygen consumption rate (OCR) values in pmol/min (normalized to total cellular protein) are shown. *p-*values for comparisons between vehicle-treated (*UT*) controls and treated cells of each type are provided in Figures 2-4 of the main text and in Supplemental Figure 3. *HIV-,* uninfected; *GFP-*, latently infected-HIV+; *GFP+,* activated HIV+ cells.

| **ATP Production** | | |
| --- | --- | --- |
|  | N | Median (IQR) |
| HIV- UT | 12 | 59.2 (55.3, 77.9) |
| HIV- Reg2 | 16 | 13.8 (12, 16.3) |
| HIV-GFP- UT | 14 | 66 (60.9, 78.6) |
| HIV-GFP- Reg2 | 19 | 13.5 (11.1, 16.5) |
| HIV+GFP+ UT | 13 | 23.5 (16, 37.8) |
| HIV+GFP+ Reg2 | 19 | 8.3 (6.6, 10.5) |

| **Proton Leak** | | |
| --- | --- | --- |
|  | N | Median (IQR) |
| HIV- UT | 12 | 11.9 (11.3, 14) |
| HIV- Reg2 | 16 | 3.2 (2.7, 5.3) |
| HIV-GFP- UT | 14 | 16.6 (15.4, 19) |
| HIV-GFP- Reg2 | 19 | 4.3 (2.7, 5.4) |
| HIV+GFP+ UT | 13 | 4.2 (2.9, 9.9) |
| HIV+GFP+ Reg2 | 19 | 3.5 (2.5, 4.5) |

| **Non-Mitochondrial OCR** | | |
| --- | --- | --- |
|  | N | Median (IQR) |
| HIV- UT | 12 | 30.8 (22.5, 47.0) |
| HIV- Reg2 | 16 | 7.5 (4.6, 9.1) |
| HIV-GFP- UT | 14 | 36.0 (25.2, 38.4) |
| HIV-GFP- Reg2 | 19 | 8.4 (4.4, 9.5) |
| HIV+GFP+ UT | 13 | 26.7 (20.8, 32.4) |
| HIV+GFP+ Reg2 | 19 | 7.1 (2.8, 10.8) |

| **Spare Respiratory Capacity** | | |
| --- | --- | --- |
|  | N | Median (IQR) |
| HIV- UT | 12 | 79.2 (67.0, 94.6) |
| HIV- Reg2 | 16 | 19.3 (13.6, 27.2) |
| HIV-GFP- UT | 14 | 100.8 (81.7, 120.6) |
| HIV-GFP- Reg2 | 19 | 23.0 (14.1, 30.5) |
| HIV+GFP+ UT | 13 | 25.0 (16.6, 36.9) |
| HIV+GFP+ Reg2 | 19 | 17.0 (13.9, 21.1) |

**Supplemental Figure 4.** Mitochondrial bioenergetics measurements at 48 hours following Regimen2 exposure in uninfected hμglia. (**a**) MitoStress curve (**blue**=vehicle-treated controls (*UT*); **red**=drug-treated cells); (**b**) non-mitochondrial OCR; (**c**) basal respiration; (**d**) maximal respiration; (**e**) proton leak; (**f**) ATP production; (**g**) spare respiratory capacity. Median and interquartile ranges of OCR values obtained from at least six technical replicates and three separate experiments are shown. (*p-*values obtained by Mann-Whitney U test)

**b**

**a**

**d e f g**

**c**


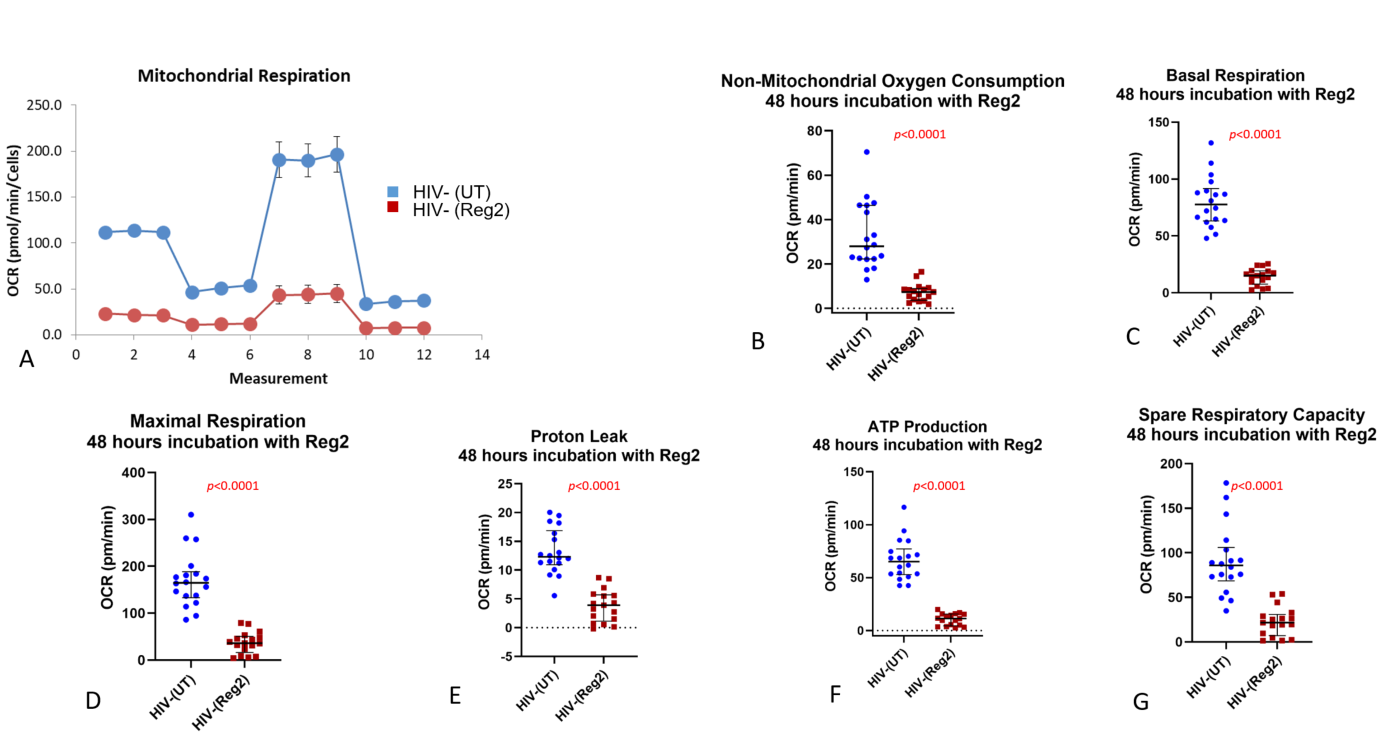


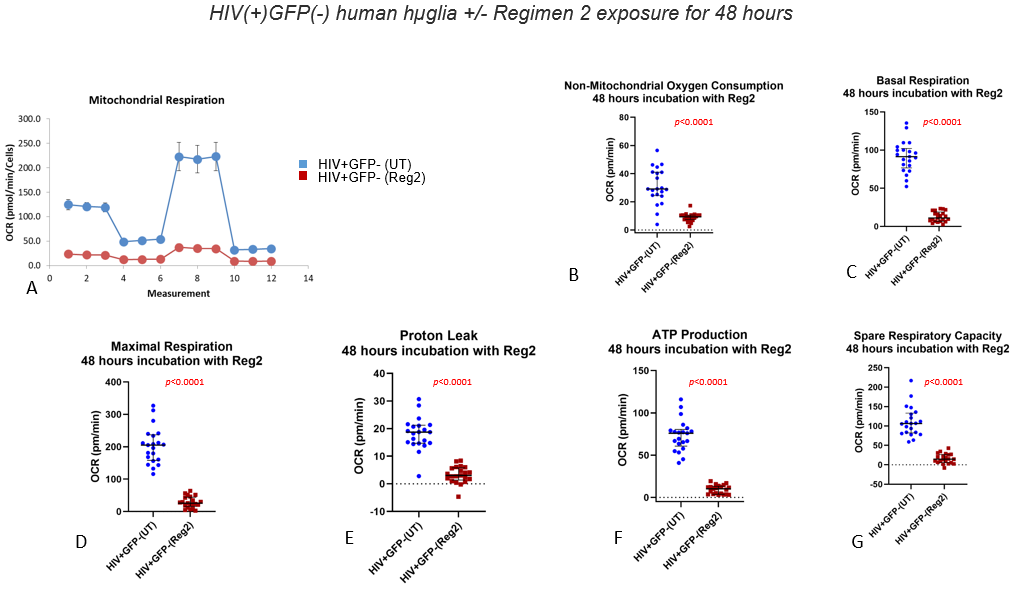


**c**

**b**

**a**

**d**

**e**

**f**

**g**

**Supplemental Figure 5.** Antiretroviral Regimen2 (*Reg2*) reduces multiple components of mitochondrial respiratory function in latently infected-HIV+ hµglia at 48 hours. (**a**) MitoStress curve (**blue**=vehicle-treated controls (*UT*); **red**=drug-treated cells); (**b**) non-mitochondrial OCR; (**c**) basal respiration; (**d**) maximal respiration; (**e**) proton leak; (F) ATP production; (**g**) Spare respiratory capacity. Median and interquartile ranges of OCR values obtained from at least three separate experiments, each with six technical replicates, are shown. (*p-*values obtained by Mann-Whitney U test)


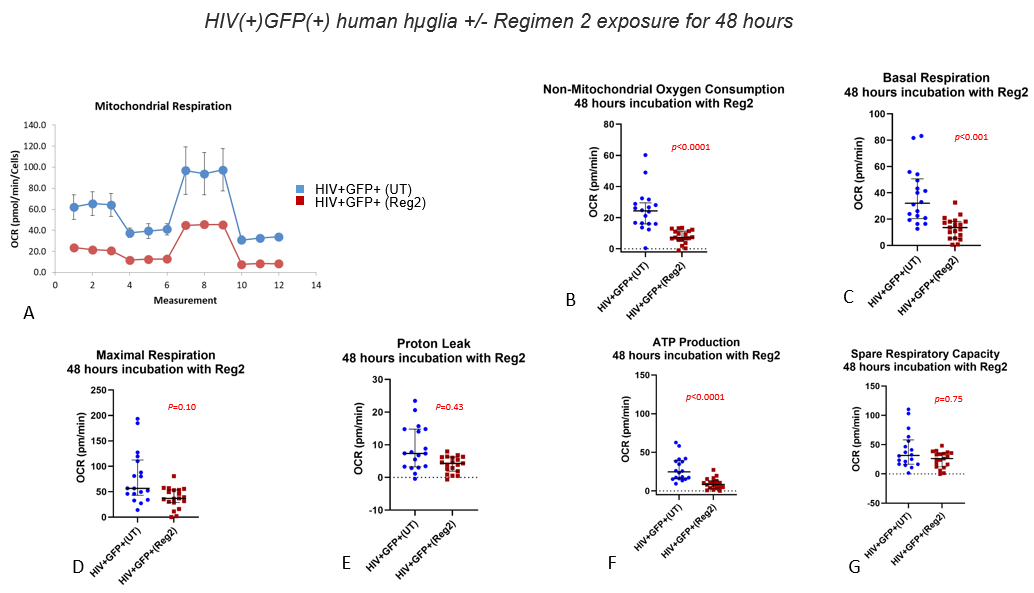


**c**

**b**

**a**

**g**

**f**

**d**

**e**

**d**

**Supplemental Figure 6.** Antiretroviral Regimen2 (*Reg2*) reduces several components of mitochondrial respiratory function in activated HIV+ hµglia at 48 hours. (**a**), MitoStress curve (**blue**=vehicle-treated controls (*UT*); **red**=drug-treated cells); (**b**), non-mitochondrial OCR; (**c**) basal respiration; (**d**), maximal respiration; (**e**) proton leak; (**f**) ATP production; (**g**) spare respiratory capacity. Median and interquartile ranges of OCR values are shown. (*p-*values obtained by Mann-Whitney U test)

**c**

**b**

**a**

**f**

**d** **e**


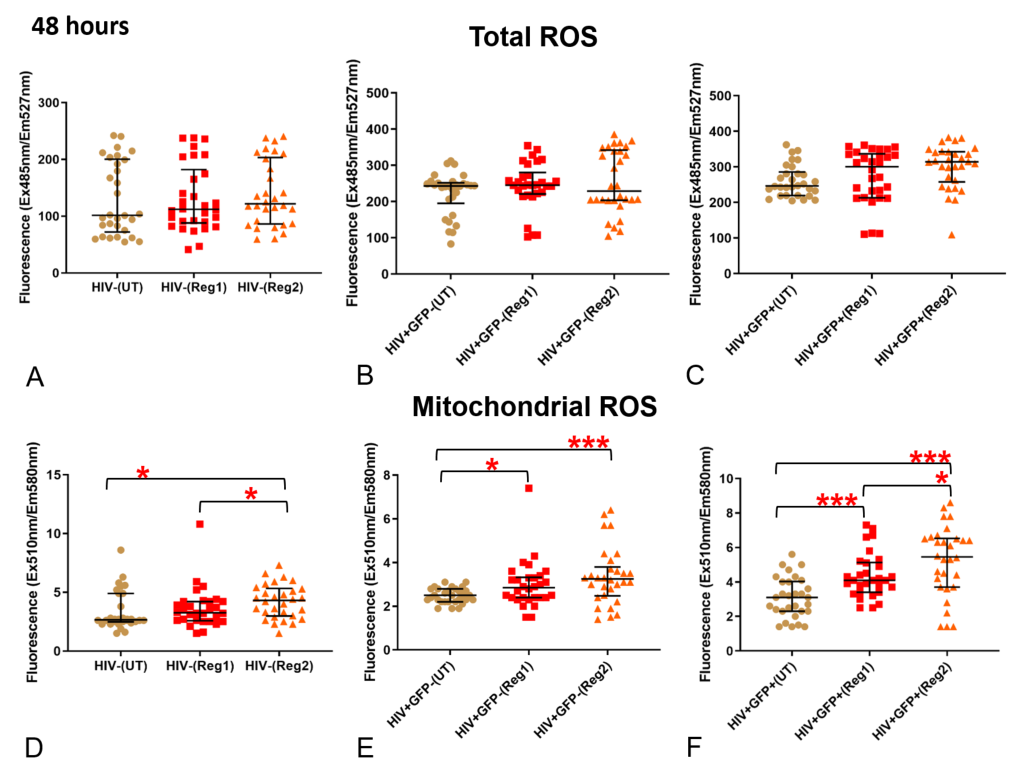


**Supplemental Figure 7.** Effects of Regimen1 (*Reg1*) and Regimen2 (*Reg2*) after 48 hours on (**a-c**) total cellular reactive oxygen species (*ROS*) production and (**d-f**) mitochondrial ROS production in: (**a, d**) uninfected, (**b, e**) latently infected HIV+, and (**c, f**) activated HIV+ hμglia. **p*<0.05; ***p*<0.005; ****p*<0.0001


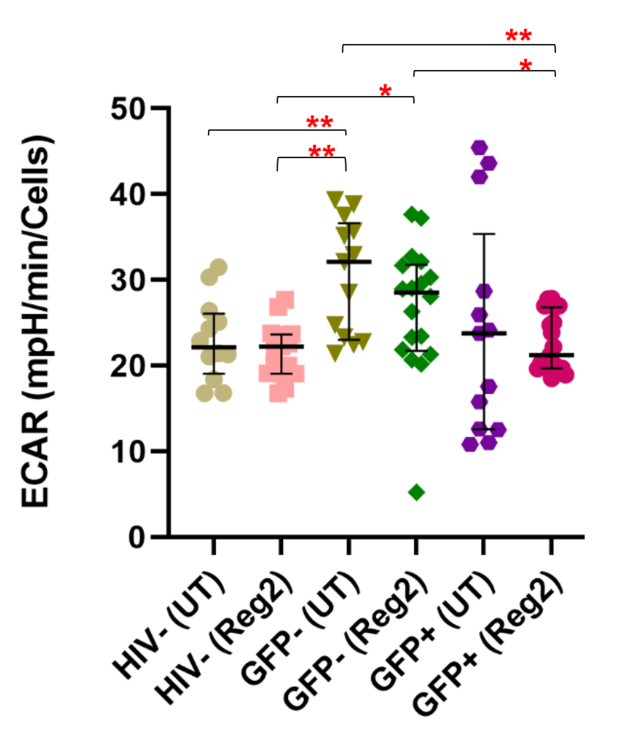


**Supplemental Figure 8.** Extracellular acidification (glycolytic) rate (*ECAR*) measurements in uninfected, latently infected-HIV+(GFP-), and activated HIV+(GFP+) hμglia after a 24-hour incubation with Regimen2 (*Reg2*). Comparisons are made to untreated (vehicle) controls (*UT*), and only statistically significant differences are shown. **p<*0.05; ***p<*0.005 (Mann-Whitney U test)


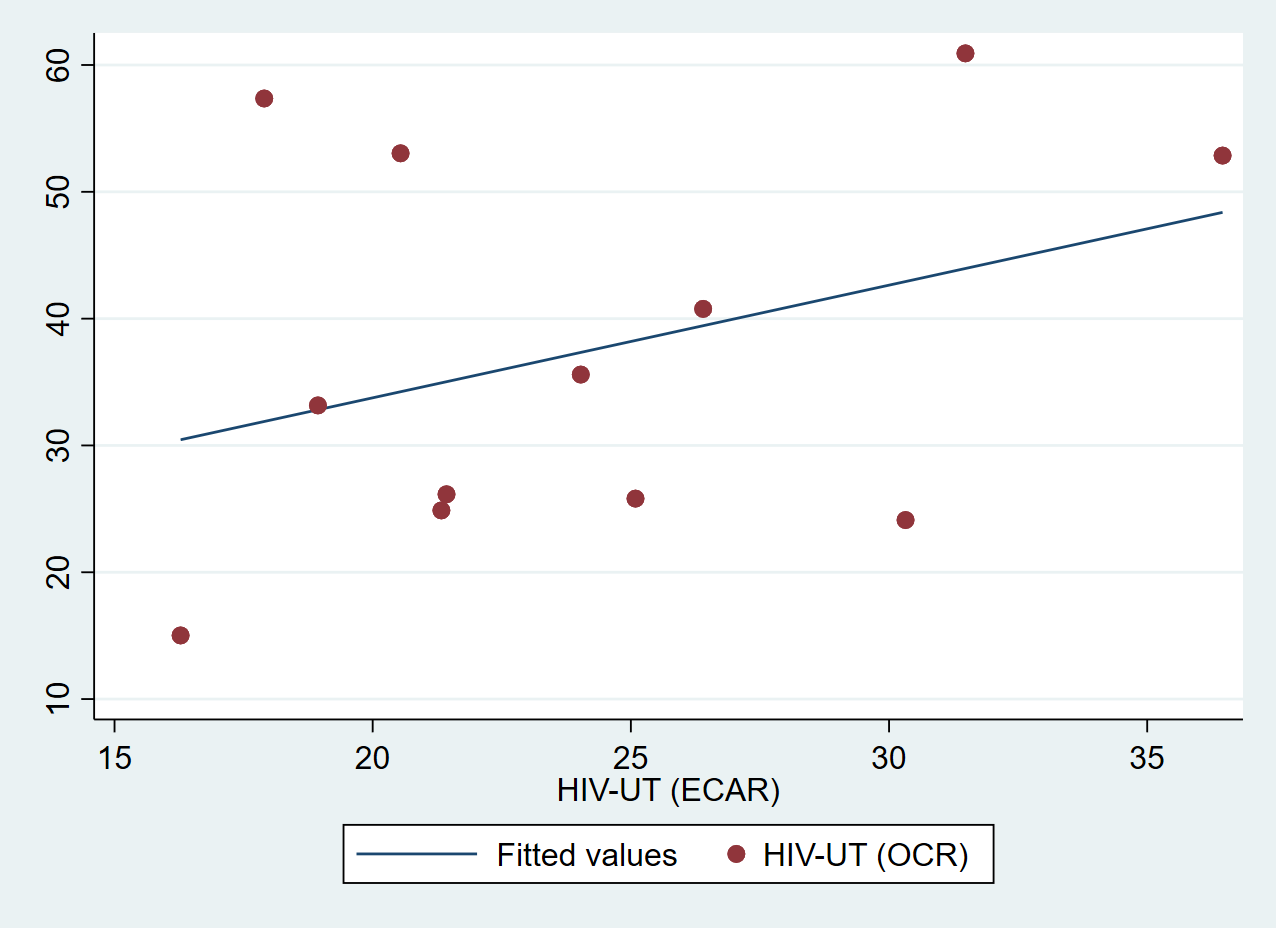
**(a)** HIV-neg, UT: *rho*=0.224 (*p=*0.485)


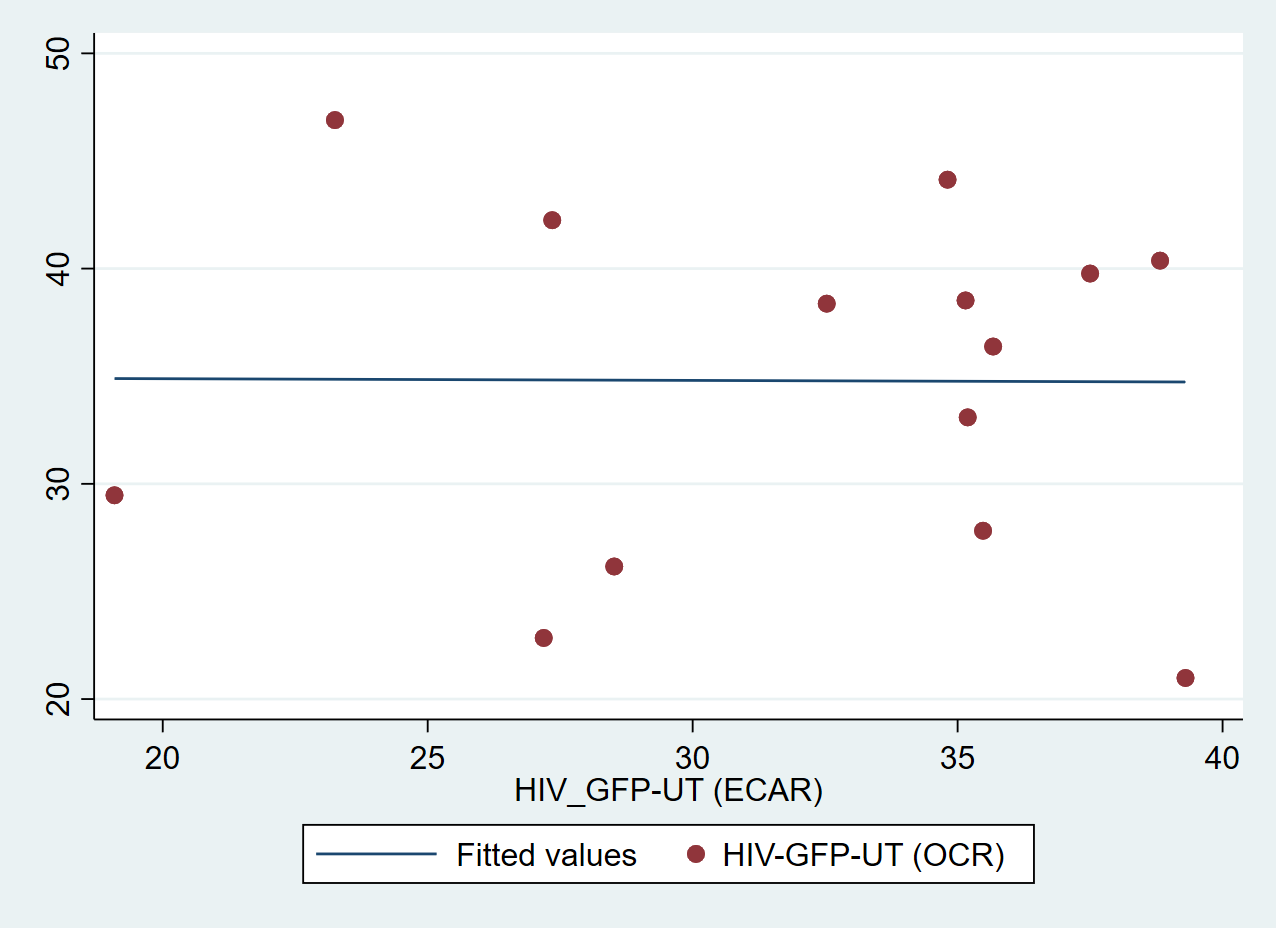
**(b)** HIV+/GFP-, UT: *rho*=-0.117 (*p*=0.692)


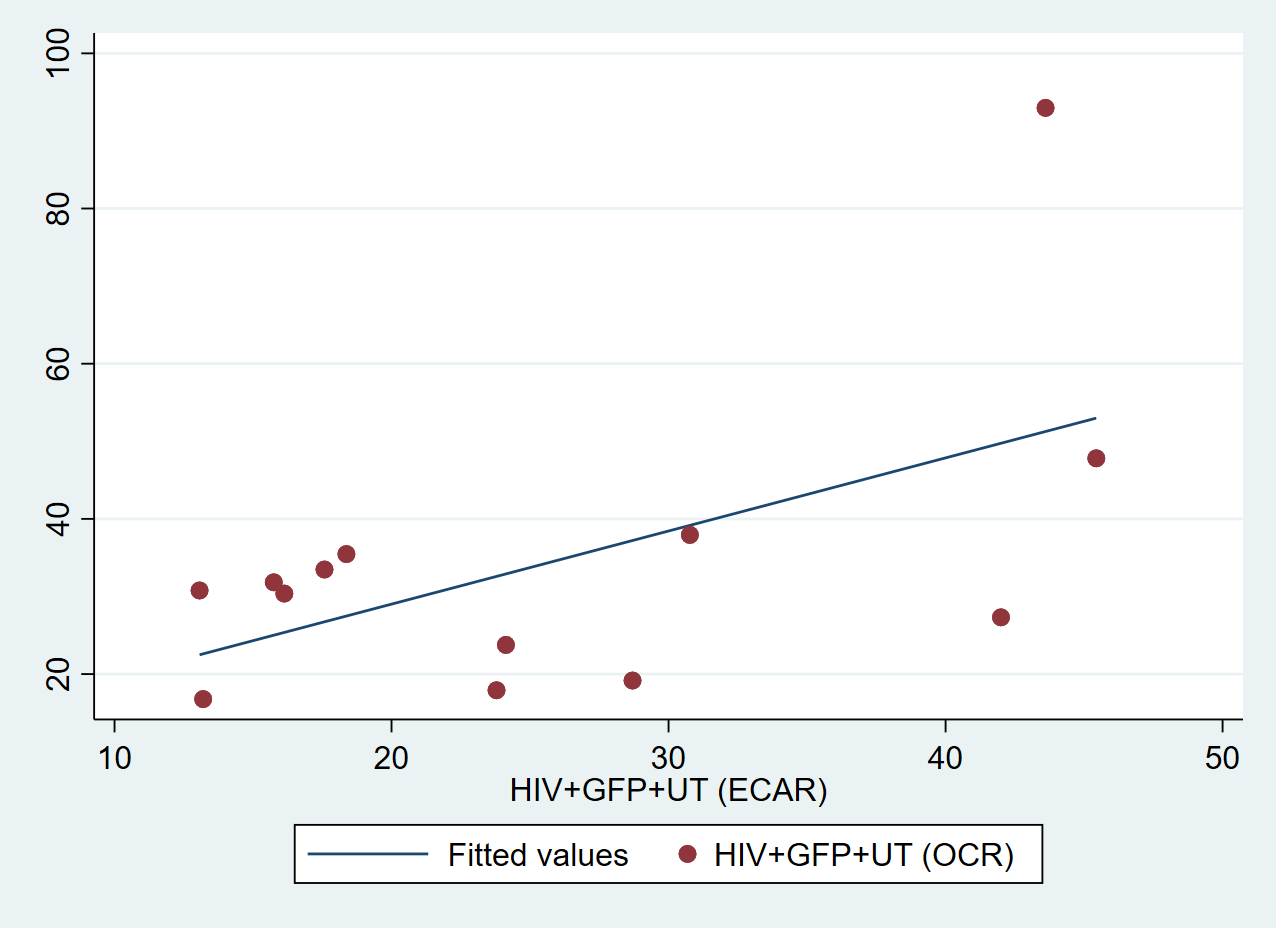
**(c)** HIV+/GFP+, UT: *rho*=0.412 (*p*=0.162)

**
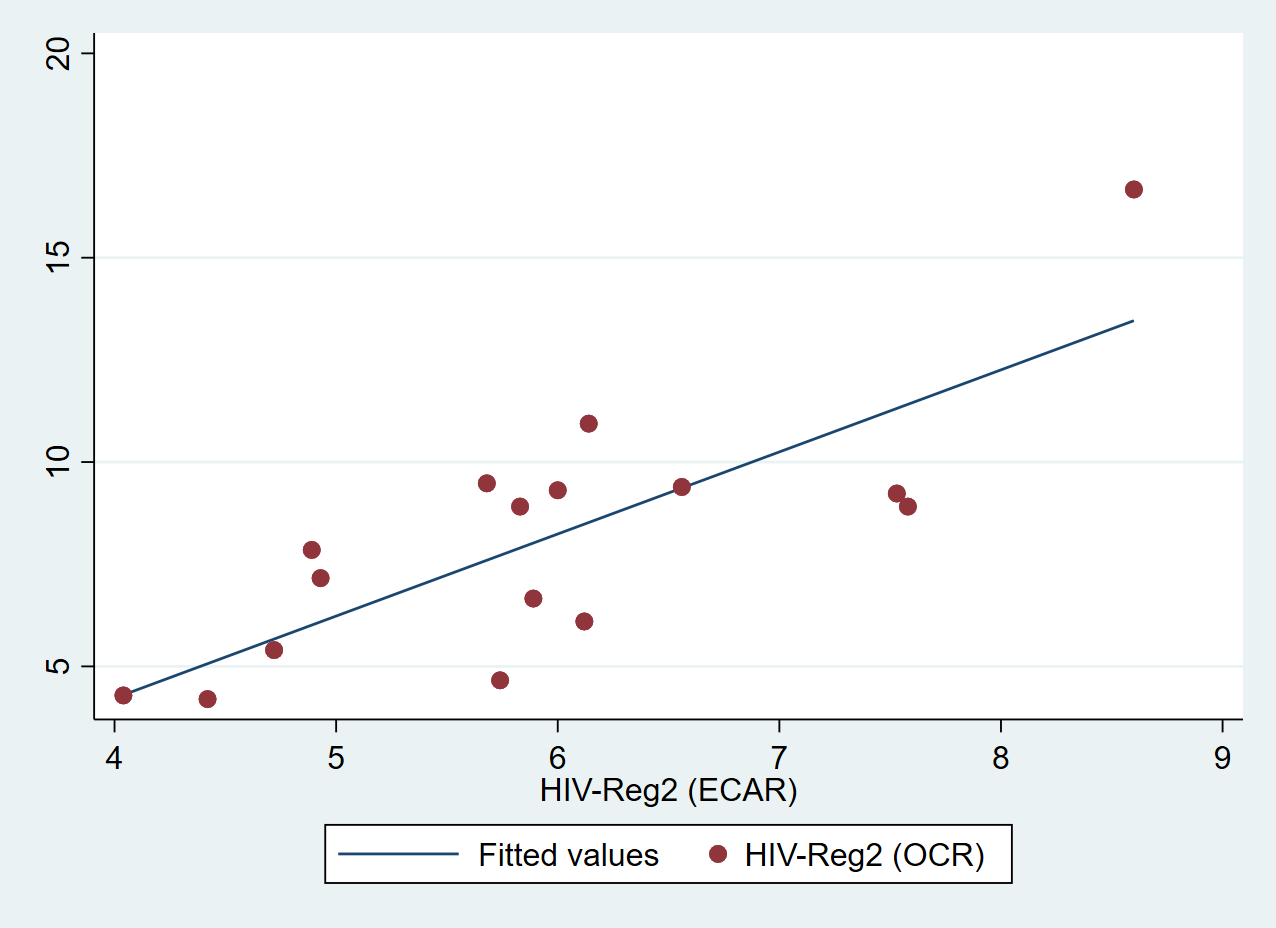
(d)** HIV-neg, Reg2: *rho*=0.702 (***p*=0.002**)


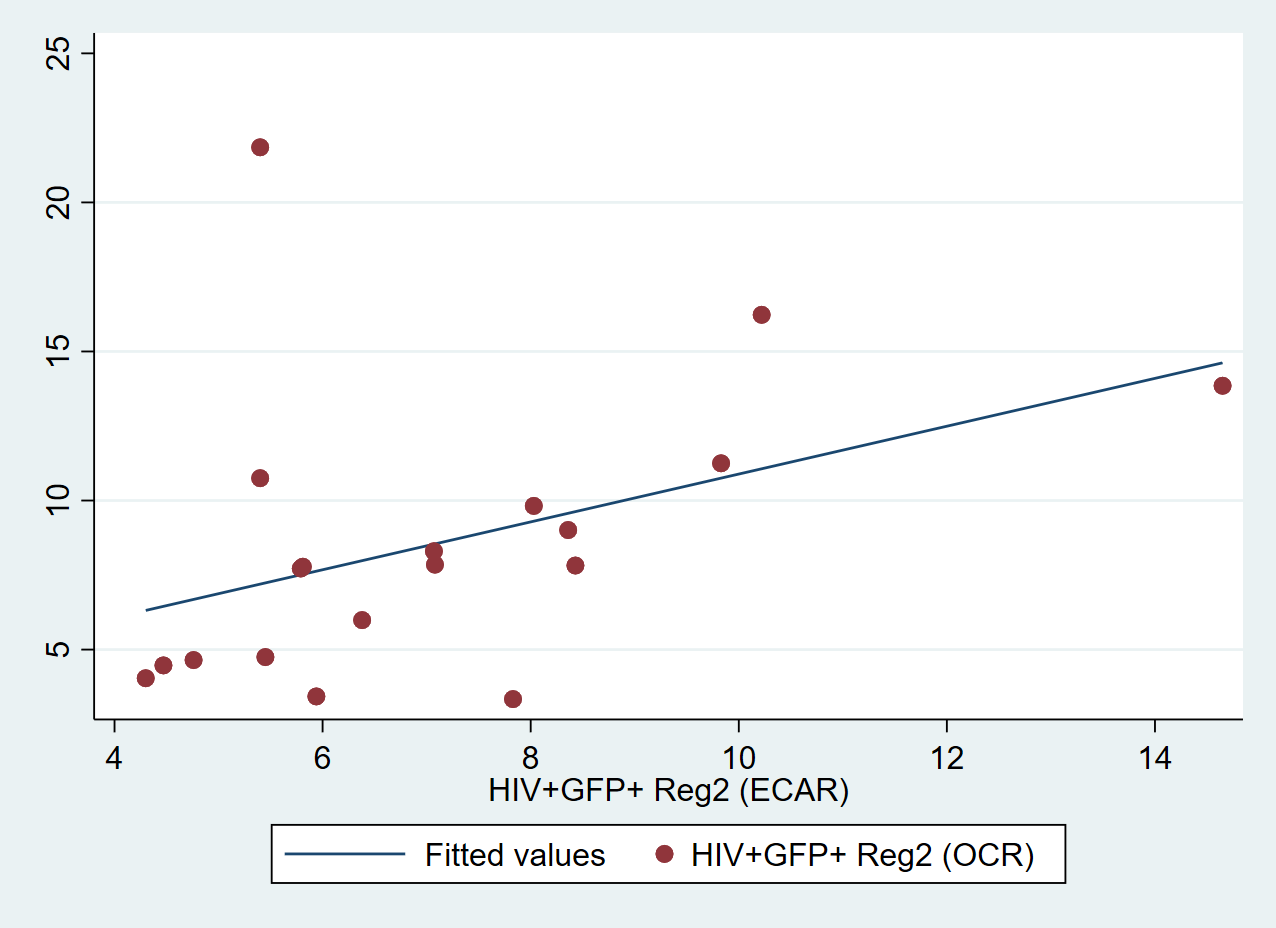
**(f)** HIV+/GFP+, Reg2: *rho*=0.488 (***p*=0.034**)


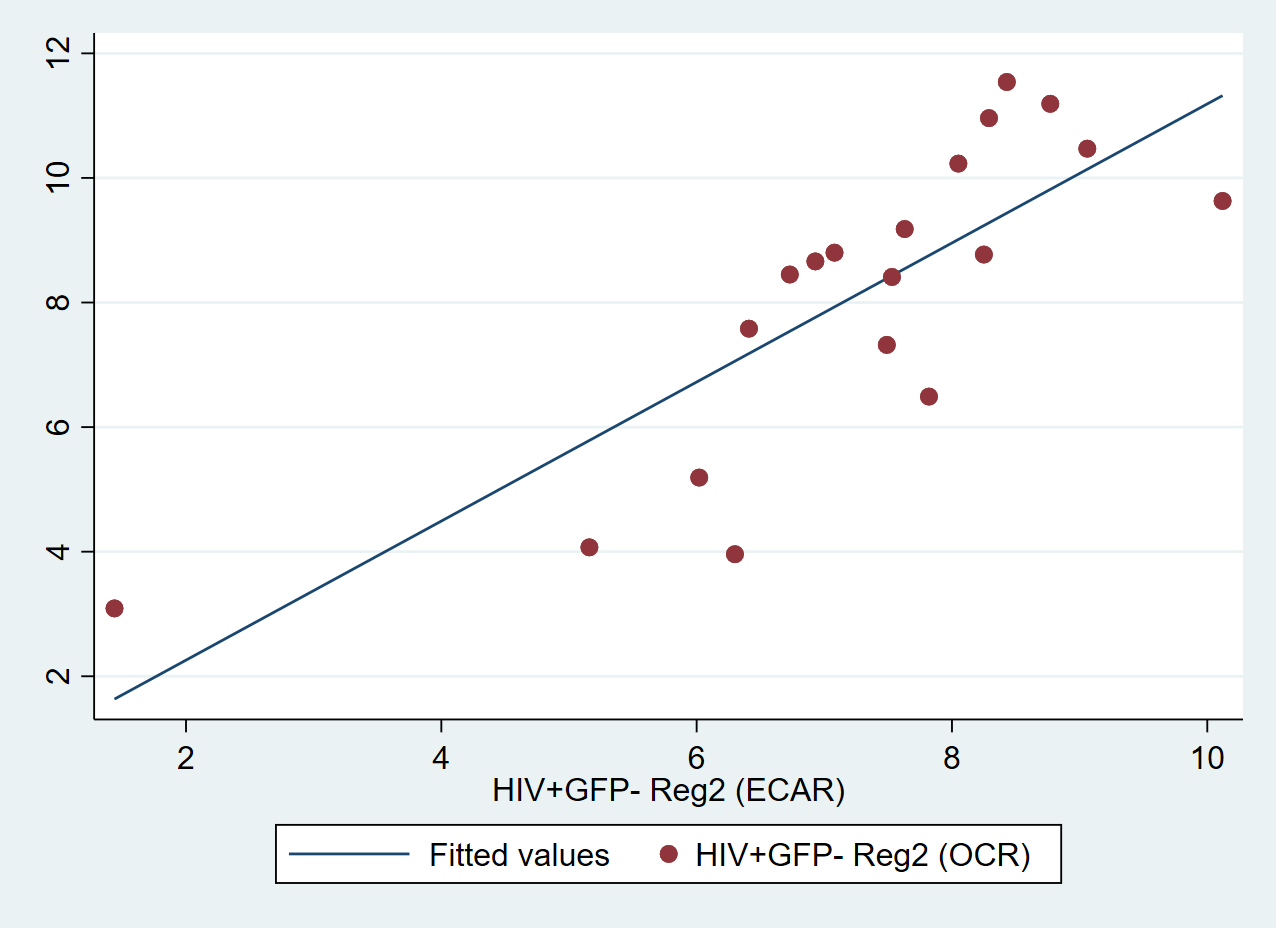
**(e)** HIV+/GFP-, Reg2: *rho*=0.854 (***p*<0.0001**)

**Supplemental Figure 9.** Correlations between basal OCR (plotted on the Y-axis) and ECAR measurements in uninfected (HIV-neg), latently infected HIV+ (HIV+/GFP-), and activated HIV+ (HIV+/GFP+) hμglia following Regimen2 exposure for 24 hours: (**a-c**) untreated cells; (**d-f**) Regimen2-treated cells after 24 hours. Spearman’s correlation *p*-values <0.05 are considered statistically significant (**bolded**).


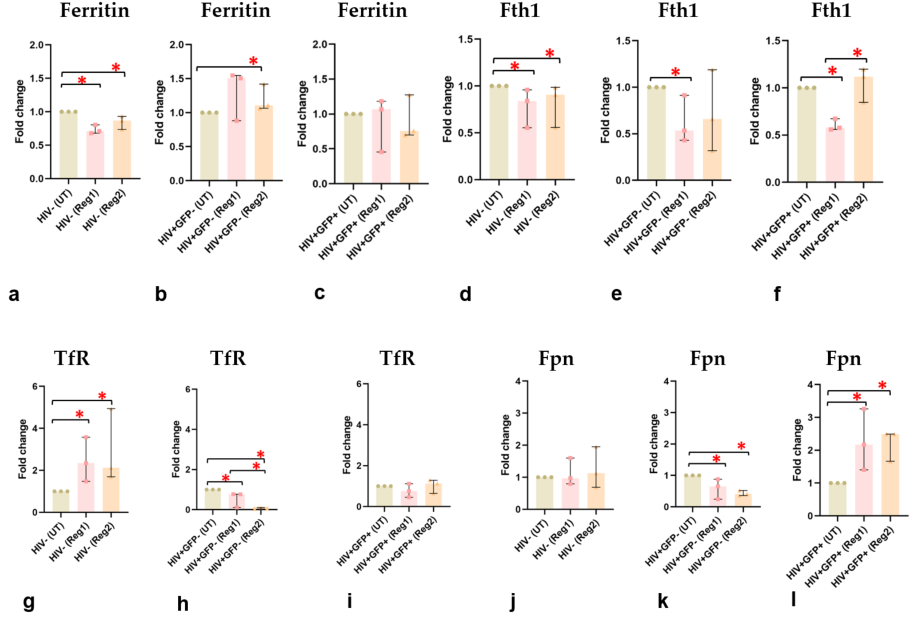


**asdf**

**Supplemental Figure 10.** Quantification of (**a-c**) total ferritin, (**d-f**) Fth1, (**g-i**) TfR, and (**j-l**) Fpn in uninfected, latently infected-HIV+ and activated HIV+ huglia at 48 hours after Regimen2 (*Reg2*) exposure. *UT*, untreated (vehicle-treated) controls; **p<*0.05(Mann-Whitney U test)

| Cell type | *Reg1* |  | *Reg2* |  | *Reg1 Iron phenotype* | *Reg2 Iron phenotype* |
| --- | --- | --- | --- | --- | --- | --- |
|  | ***24 hrs*** | ***48 hrs*** | ***24 hrs*** | ***48 hrs*** |  |  |
| HIV-negative  Ferritin | NC | DOWN* | NC | DOWN* | Iron import | Iron import |
| Fth1 | NC | DOWN* | NC | DOWN* | Iron import | Iron import |
| TfR | UP* | UP* | UP* | UP* | Iron import | Iron import |
| Fpn | NC | NC | UP* | NC | None | Iron export |
| Iron | UP* | N/A | UP* | N/A | Iron replete/excess | Iron replete/excess |
| Latent HIV+  Ferritin | UP* | NC | NC | DOWN* | Iron export | Iron import |
| Fth1 | NC | DOWN* | NC | NC | Iron import | None |
| TfR | NC | DOWN* | NC | DOWN* | Iron export | Iron export |
| Fpn | NC | DOWN* | NC | DOWN* | Iron import | Iron import |
| Iron | UP* | N/A | UP* | N/A | Iron replete/excess | Iron replete/excess |
| Activated HIV+  Ferritin | DOWN* | NC | DOWN* | NC | Iron import | Iron import |
| Fth1 | NC | DOWN* | NC | UP* | Iron import | Iron export |
| TfR | NC | NC | NC | NC | None | None |
| Fpn | NC | UP* | NC | UP* | Iron export | Iron export |
| Iron | UP* | N/A | DOWN* | N/A | Iron replete/excess | Reduced/Low iron |
| SH-SY5Y cells | ***BIC***  ***24 hrs*** | ***Reg2***  ***24 hrs*** | | | **Comments** | |
| Ferritin | N/A | N/A | | | None | |
| Fth1 | DOWN* | DOWN* | | | Iron import | |
| TfR | UP* | N/A | | | Iron import | |
| Iron | N/A | UP* | | | Iron replete/excess | |

**Supplemental Table 2.** Summary of changes in cellular iron phenotype of hμglia and SH-SY5Y cells after exposure to ARV Regimens 1 or 2, indicating altered iron homeostasis and dysregulated iron transport protein expression, due to both ARVs and HIV in hμglia, and ARVs in the neural cells. *Statistically significant with *p*-value<0.05; *Reg1/2,* Regimen 1/2; *NC*, no change; *N/A*, not assessed. TfR changes were used to anchor assessment of iron import *vs*. export.

**Supplemental Figure 11.** N-acetylcysteine (*NAC*), a cytosolic ROS scavenger, but not the mitochondrial ROS scavenger MitoTEMPO (*MT*) rescues the mitochondrial defect due to ARV Regimen2 (*Reg2*) in SH-SY5Y cells at 24 hours. *******p*=0.007


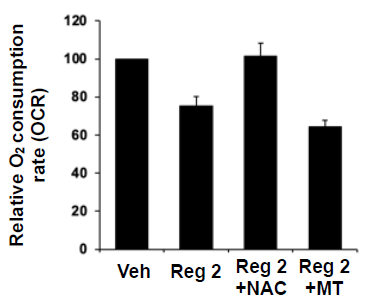


**

**
